# Supplementary material for: Highly selective sorption of CO2 and N2O and strong gas-framework interactions in a nickel(ii) organic material
Source: Royal Society of Chemistry journal article supplement (doi:10.1039/c6ta06572d), 2016-01-01
Supplement: c6ta06572d1.pdf [file c6ta06572d1.pdf]

**Supporting Information for**

**Highly selective sorption of CO<sub>2</sub> and N<sub>2</sub>O and strong gas-framework interactions in a nickel(II)-organic material**

Xiaoping Zhang, Wenjie Chen, Wei Shi,\* and Peng Cheng\*

*Department of Chemistry, Key Laboratory of Advanced Energy Materials Chemistry (MOE), State Key Laboratory of Elemento-Organic Chemistry, and Collaborative Innovation Center of Chemical Science and Engineering (Tianjin), Nankai University, Tianjin 300071, P. R. China, Fax: (+86) 22-23502458, E-mail: [shiwei@nankai.edu.cn](mailto:shiwei@nankai.edu.cn); [pcheng@nankai.edu.cn](mailto:pcheng@nankai.edu.cn).*

**Table of Contents**

|            |                                        |        |
|------------|----------------------------------------|--------|
| Section S1 | Materials and crystal structure        | S2-S3  |
| Section S2 | Thermogravimetric analysis             | S4     |
| Section S3 | Powder X-ray diffraction analysis      | S5     |
| Section S4 | Low-pressure gas sorption measurements | S6-S10 |

## Section S1. Materials and X-ray Crystal Structure

**Table S1.** Crystal data and structure refinements for Ni-MOF.

|                                                                      | Ni-MOF                                             |
|----------------------------------------------------------------------|----------------------------------------------------|
| formula                                                              | C <sub>11</sub> H <sub>16</sub> NO <sub>8</sub> Ni |
| FW                                                                   | 348.94                                             |
| T (K)                                                                | 129.60(10)                                         |
| crystal system                                                       | Tetragonal                                         |
| space group                                                          | I4 <sub>1</sub> 22                                 |
| a (Å)                                                                | 15.1780(5)                                         |
| b (Å)                                                                | 15.1780(5)                                         |
| c (Å)                                                                | 12.0813(5)                                         |
| α (deg)                                                              | 90.00                                              |
| β (deg)                                                              | 90.00                                              |
| γ (deg)                                                              | 90.00                                              |
| V (Å <sup>3</sup> )                                                  | 2783.19(18)                                        |
| Z                                                                    | 8                                                  |
| ρ <sub>calc</sub> (g/cm <sup>3</sup> )                               | 1.211                                              |
| μ (mm <sup>-1</sup> )                                                | 1.397                                              |
| index ranges                                                         | -18 ≤ h ≤ 8<br>-12 ≤ k ≤ 15<br>-14 ≤ l ≤ 13        |
| reflins collected                                                    | 2606                                               |
| Independent( <i>R</i> <sub>int</sub> )                               | 1219 (0.0808)                                      |
| data/restraints/parameters                                           | 1219, 75, 36                                       |
| GOF on <i>F</i> <sup>2</sup>                                         | 1.066                                              |
| <i>R</i> <sub>1</sub> , ω <i>R</i> <sub>2</sub> [ >2σ ( <i>I</i> ) ] | 0.0691, 0.1735                                     |
| <i>R</i> <sub>1</sub> , ω <i>R</i> <sub>2</sub> (all data)           | 0.0732, 0.1792                                     |
| largest diff. peak/hole (e/Å <sup>3</sup> )                          | 1.997, -0.788                                      |

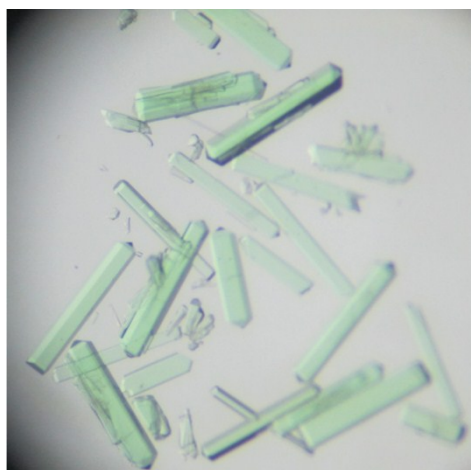

**Fig. S1** View of the strip crystal Ni-MOF.

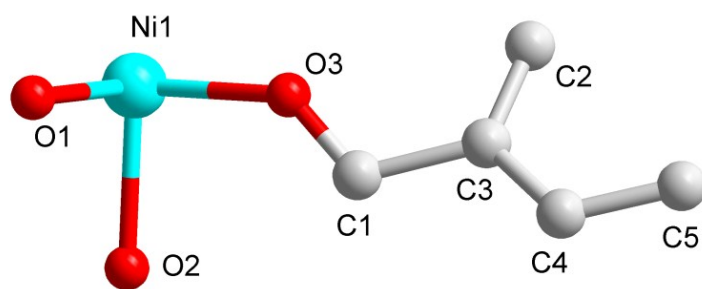

**Fig. S2** Asymmetric unit of Ni-MOF (hydrogen atoms have been omitted for clarity).

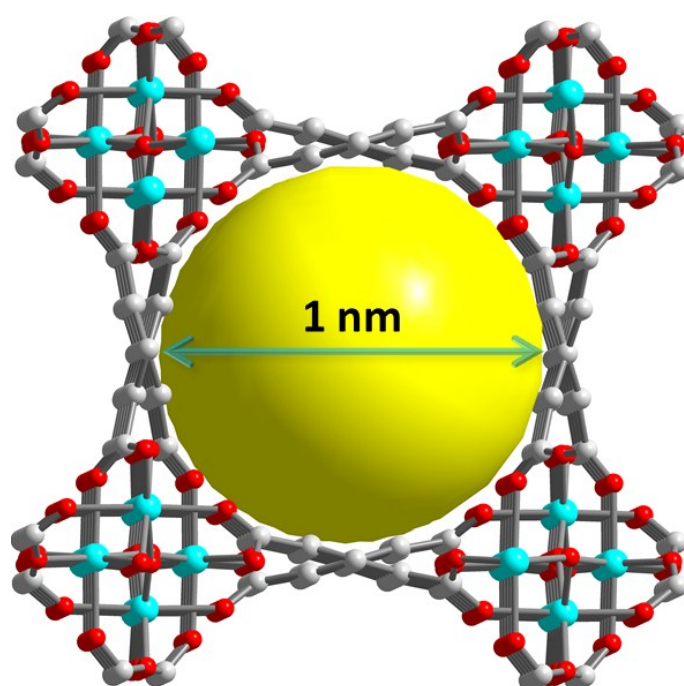

**Fig. S3** View of 1D nanosized channel in Ni-MOF along the crystallographic *c* axis.

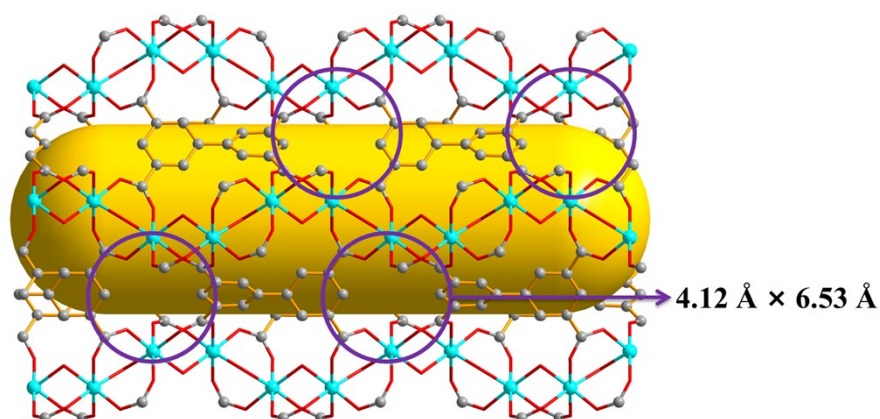

**Fig. S4** View of 1D nanosized channel in Ni-MOF along the crystallographic *a* axis (*b* direction exhibits the same window as *a* axis).

## Section S2 Thermogravimetric analysis

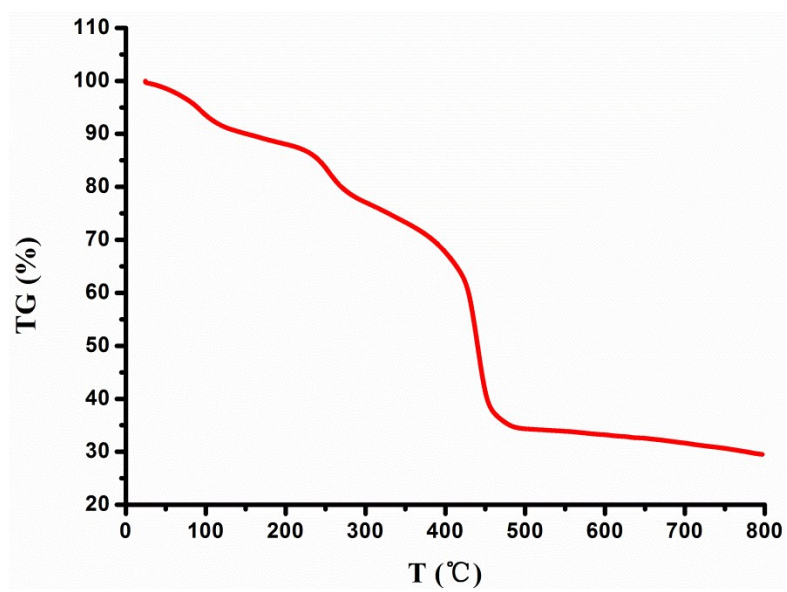

**Fig. S5** Thermogravimetric analysis of as-synthesized material of Ni-MOF.

### Section S3 powder X-ray diffraction analysis

The crystal structure was characterized by single-crystal X-ray diffraction studies, and the phase purity of the bulk material, CH<sub>3</sub>OH-exchange sample and sample after gas sorption was verified by powder X-ray diffraction

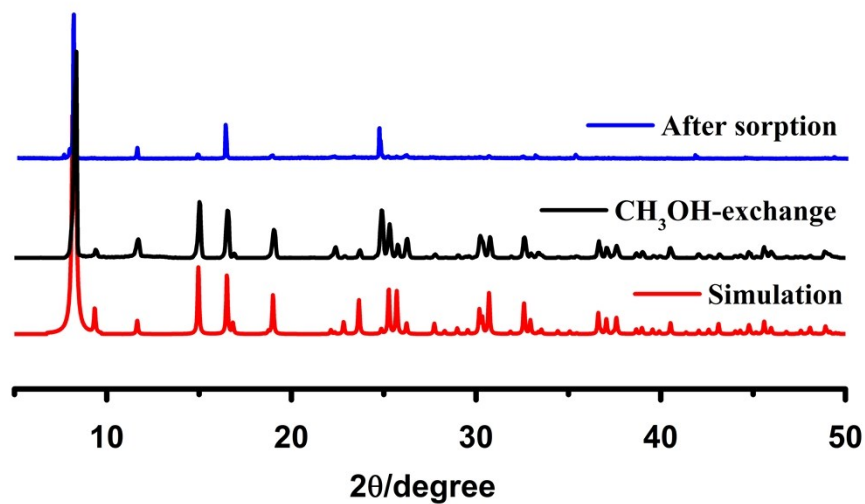

**Fig. S6** Simulated PXRD patterns, CH<sub>3</sub>OH-exchanged, and sample after gas sorption of Ni-MOF.

## Section S4 Low-pressure gas sorption measurements

### Estimation of the isosteric heats of gas adsorption.

A virial-type expression comprising the temperature-independent parameters  $a_i$  and  $b_j$  is employed to calculate the enthalpies of adsorption for CH<sub>4</sub>, N<sub>2</sub>O and CO<sub>2</sub> (at 273 and 298 K/313 K) on **Ni-MOF**. The zero-coverage isosteric heat of adsorption is evaluated by first fitting the temperature-dependent isotherm data to a virial-type expression,<sup>1</sup> which can be written as follows:

$$\ln P = \ln N + 1/T \sum_{i=0}^m a_i N^i + \sum_{j=0}^n b_j N^j \quad (\text{S1})$$

In eq (S1),  $P$  is the pressure expressed in Torr,  $N$  is the amount adsorbed in mmol/g,  $T$  is the temperature in K,  $a_i$  and  $b_j$  are virial coefficients, and  $m$ ,  $n$  represent the number of coefficients required to adequately describe the isotherms ( $m$  and  $n$  are gradually increased until the contribution of extra added  $a$  and  $b$  coefficients is deemed to be statistically insignificant towards the overall fit, and the average value of the squared deviations from the experimental values is minimized). The values of the virial coefficients  $a_0$  through  $a_m$  are then used to calculate the isosteric heat of adsorption using the following expression.

$$Q_{st} = -R \sum_{i=0}^m a_i N^i \quad (\text{S2})$$

and it follows that the zero-coverage isosteric heat of adsorption is given by:

$$Q_{st} = -R a_0 \quad (\text{S3})$$

$Q_{st}$  is the coverage-dependent isosteric heat of adsorption and  $R$  is the universal gas constant. The heat of CO<sub>2</sub>, N<sub>2</sub>O and CH<sub>4</sub> sorption for **Ni-MOF** in the paper is determined by using the low pressure gas sorption data measured in the pressure range from 0 to 1 bar (273 and 298 K/313 K).

### Selectivity Prediction for Binary Mixture Adsorption: Ideal adsorbed solution theory (IAST).

Ideal adsorbed solution theory (IAST)<sup>2</sup> is used to predict binary mixture adsorption from the experimental pure-gas isotherms. To perform the integrations required by IAST, the single component isotherms should be fitted by a proper model. There is no restriction on the choice of the model to fit the adsorption isotherm, however, data over the pressure range under study should be fitted very precise.<sup>3</sup> To determine the amount adsorbed in the mixture, as opposed to the mole fraction, the following equation can be used:

$$\frac{1}{n_{total}} = \frac{x_i}{n_i^0} + \frac{x_j}{n_j^0} \quad (\text{S4})$$

where, at a given pressure,  $n_{total}$  is the total number of moles adsorbed in the mixture and  $n_i^0$  is

the amount of pure component  $i$  adsorbed per gram of adsorbent.

Several isotherm models are tested to fit the experimental pure isotherms for  $\text{CO}_2$ ,  $\text{N}_2\text{O}$ ,  $\text{N}_2$ ,  $\text{O}_2$  and  $\text{CH}_4$  at 273 and 298 K/313 K.

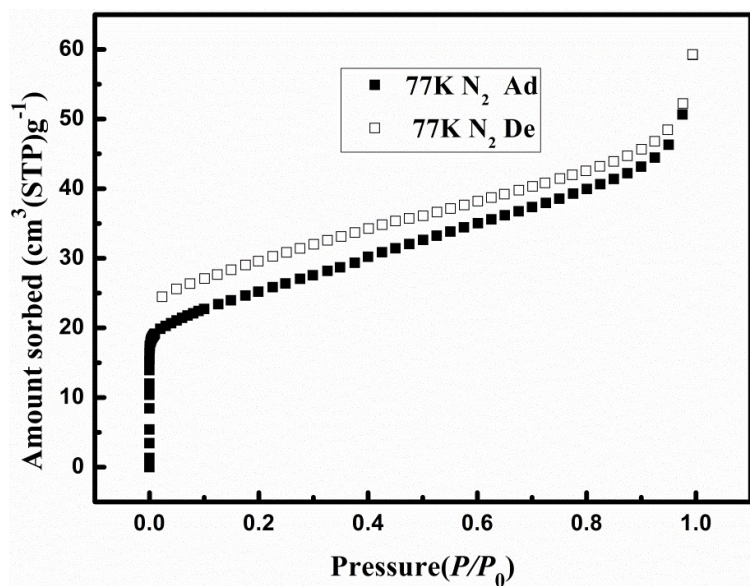

**Fig. S7**  $\text{N}_2$  gas sorption at 77K. Adsorption and desorption branches are shown with filled and empty symbols, respectively.

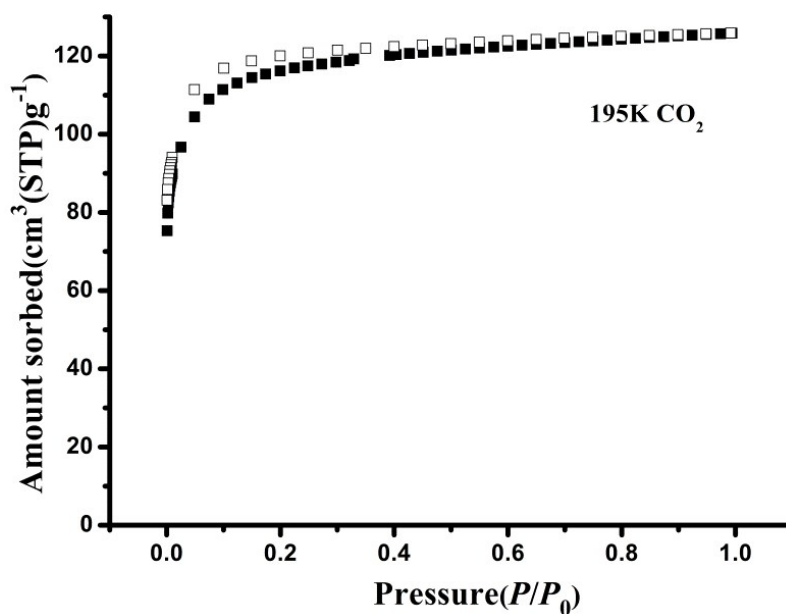

**Fig. S8**  $\text{CO}_2$  capture at 195 K. Adsorption and desorption branches are shown with filled and empty symbols, respectively.



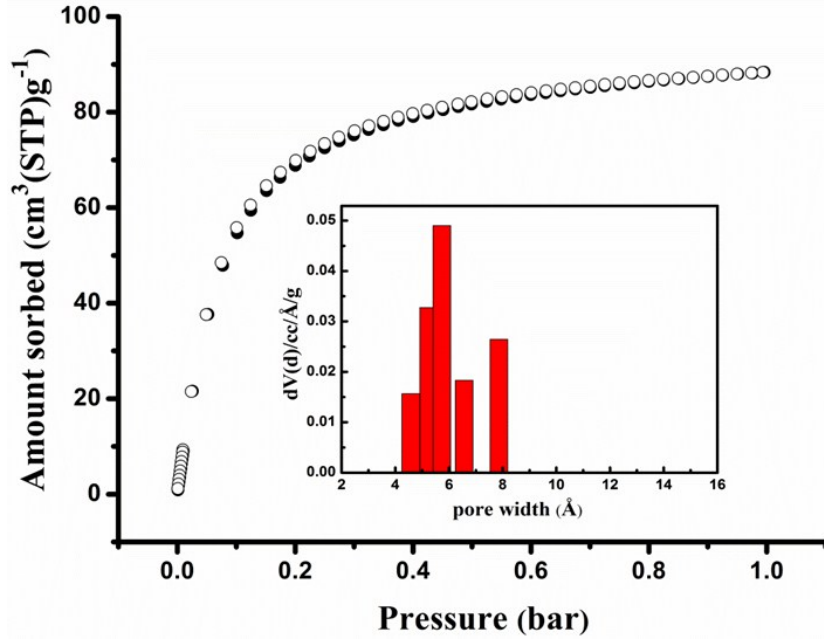

**Fig. S9** CO<sub>2</sub> capture at 273 K and the pore size distribution. Adsorption and desorption branches are shown with filled and empty symbols, respectively.

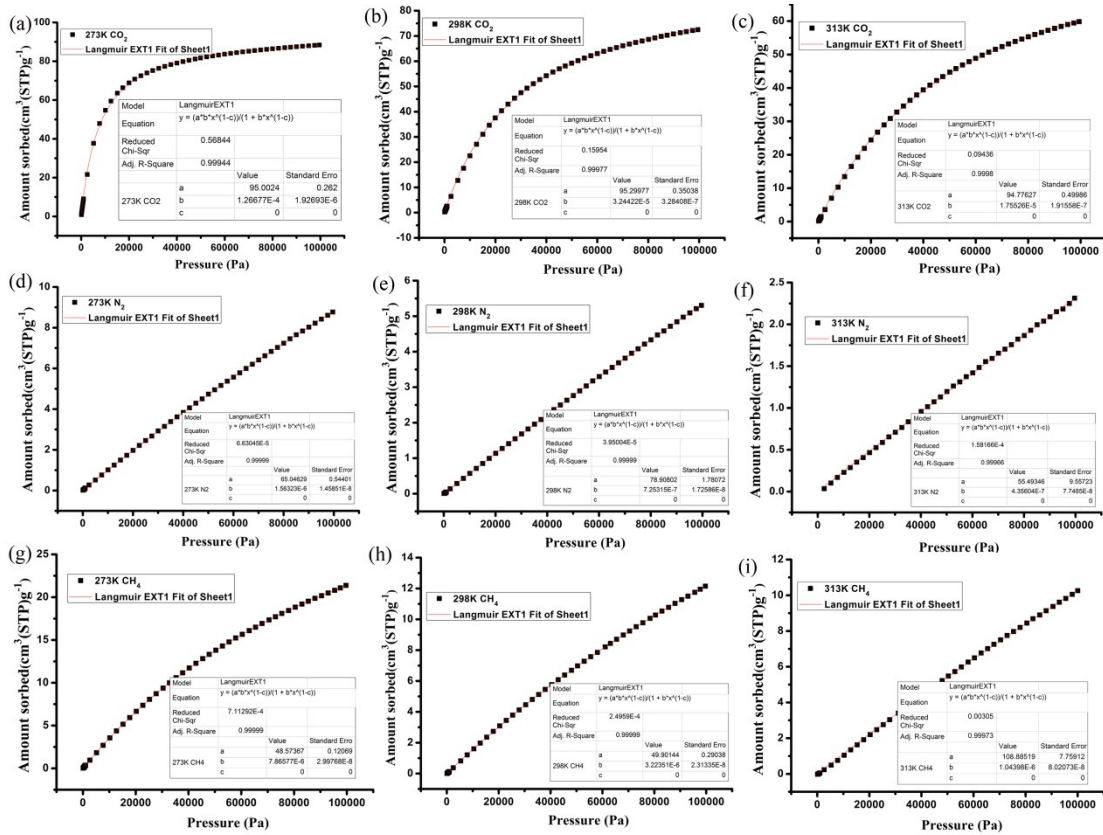

**Fig. S10** IAST calculated selectivity abilities of CO<sub>2</sub>, N<sub>2</sub> and CH<sub>4</sub> gases at 273, 298 K and 313 K, respectively.



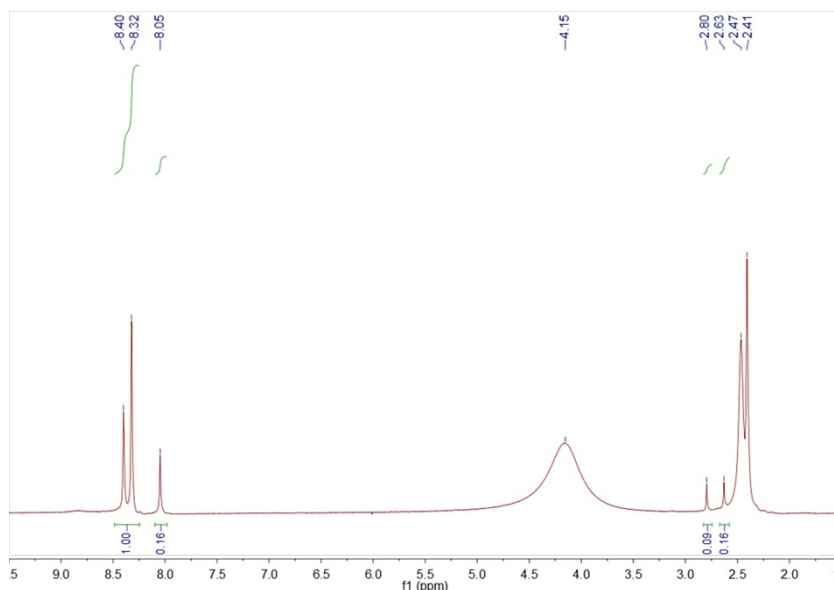

**Fig. S11**  $^1\text{H}$  NMR Spectrum of activated Ni-MOF (300 MHz,  $\text{DMSO-}d_6$ ). Ni-MOF was digested in 750  $\mu\text{L}$   $(\text{CD}_3)_2\text{SO}$  and 10  $\mu\text{L}$  of 35% DCl with sonication for 10 min.

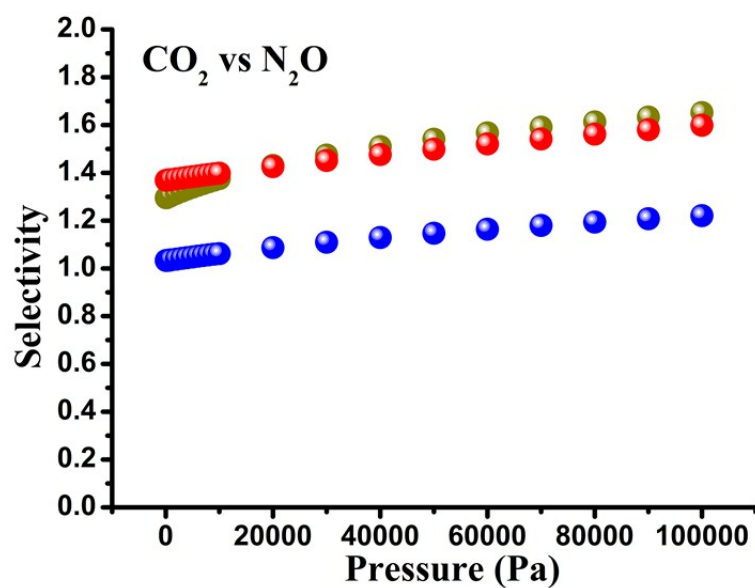

**Fig. S12** IAST predicted selectivities for  $\text{CO}_2/\text{N}_2\text{O}$  (273 K dark yellow, 298 K blue, and 313 K red).

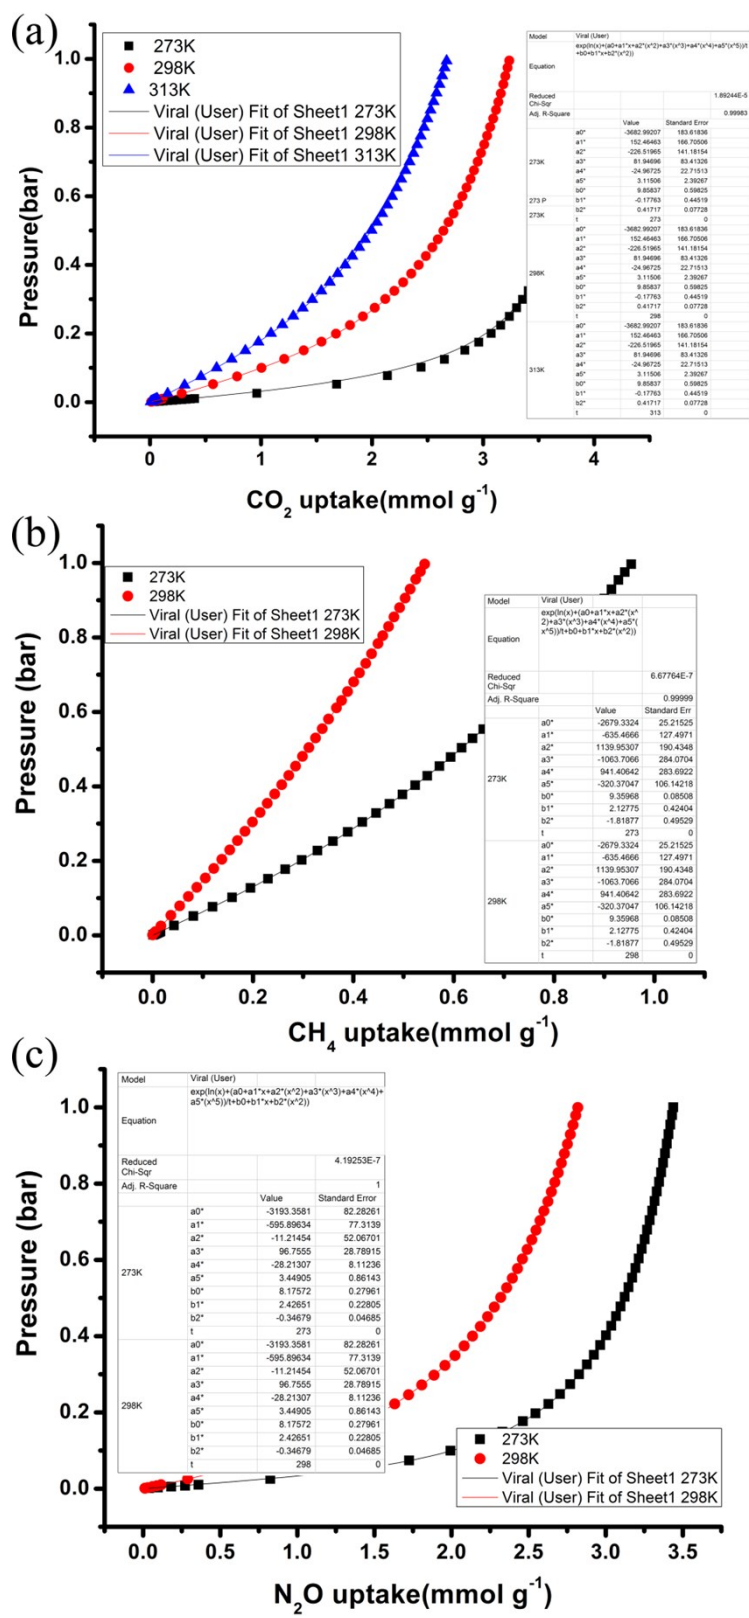

**Fig. S13** The isosteric heat of adsorption ( $Q_{st}$ ) of CO<sub>2</sub>, CH<sub>4</sub> and N<sub>2</sub>O calculated from the adsorption isotherms at 273, 298 K and 313K (for CO<sub>2</sub>) by using virial-type fitting for Ni-MOF.

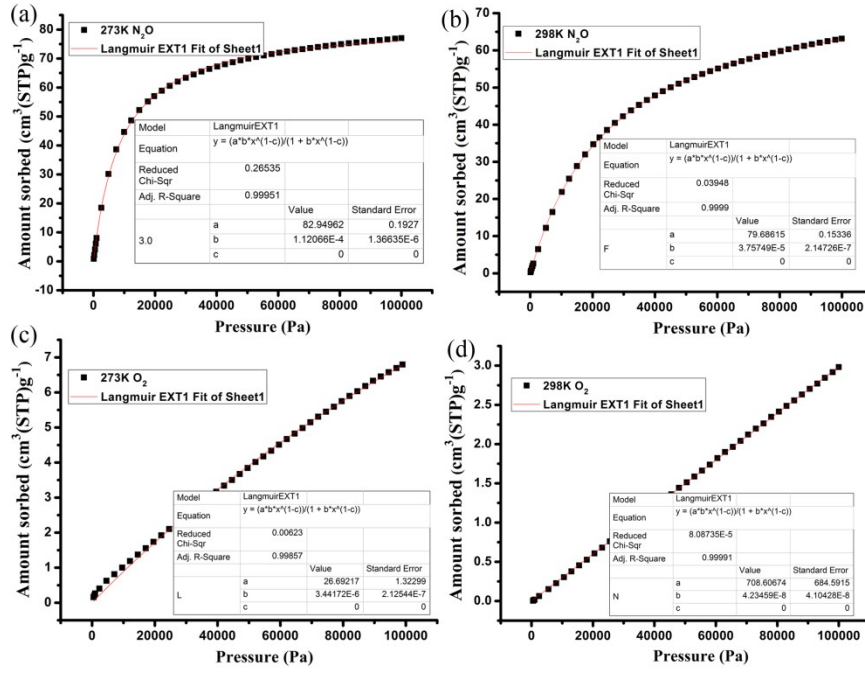

Fig. S14 IAST calculated selectivity abilities of N<sub>2</sub>O and O<sub>2</sub> at 273 and 298 K.

References:

- 1 L. Czepirski and J. Jagiello, *Chem. Eng. Sci.*, 1989, **44**, 797.
- 2 A. L. Myers and J. M. Prausnitz, *AIChE J.*, 1965, **11**, 121.
- 3 S. J. Keskin, *Phys. Chem. C*, 2011, **115**, 800.
